# Supplementary material for: Molecular corridors and parameterizations of volatility in the chemical evolution of organic aerosols
Source: Copernicus journal article supplement (doi:10.5194/acp-16-3327-2016), 2016-03-14
Supplement: Supplementary file 1 [file acp-16-3327-2016-supplement.pdf]

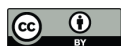

*Supplement of*

## **Molecular corridors and parameterizations of volatility in the chemical evolution of organic aerosols**

**Ying Li et al.**

*Correspondence to:* Manabu Shiraiwa (m.shiraiwa@mpic.de)

The copyright of individual parts of the supplement might differ from the CC-BY 3.0 licence.

Table S1 shows the best-fit parameters for the following equation including the contribution of the number of hydrogen atoms to the saturation mass concentration. Comparing Fig. 3 and Fig. S1 as well as Fig. 4 and Fig. S2, we found that inclusion of the number of hydrogen atoms (Eq. S1) could improve the prediction for compounds in the CH class but has only slight impact on the prediction for compounds in other composition classes.

$$\log_{10}C_o = (n_C^0 - n_C)b_C - n_O b_O - n_H b_H - 2 \frac{n_C n_O}{n_C + n_O} b_{CO} - n_N b_N - n_S b_S \quad (1)$$

**Table S1.** Composition classes and the  $n_C^0$  and  $b$  values for saturation mass concentration parameterizations (Eq. S1) obtained by least-squares optimization using the NCI database.

| Classes | $n_C^0$ | $b_C$  | $b_H$    | $b_O$  | $b_{CO}$ | $b_N$  | $b_S$  |
|---------|---------|--------|----------|--------|----------|--------|--------|
| CH      | 17.95   | 0.5742 | -0.1417  |        |          |        |        |
| CHO     | 15.77   | 0.6238 | -0.1387  | 1.735  | -0.8592  |        |        |
| CHN     | 23.01   | 0.4307 | -0.02110 |        |          | 0.9528 |        |
| CHON    | 21.12   | 0.4139 | -0.03760 | 0.8092 | -0.1174  | 1.1010 |        |
| CHOS    | 16.07   | 0.5348 | -0.1507  | 1.354  | -0.4175  |        | 0.8993 |
| CHONS   | 19.20   | 0.5469 | -0.1368  | 1.183  | 0.07310  | 1.0289 | 1.323  |

**Table S2.** Statistics for comparison of the saturation mass concentration of nitrogen- and sulfur-containing compounds predicted by the EPI Suite (E) and the Eq. (2) (P).

|                   | Number | Median_E <sup>a</sup> | Median_P <sup>b</sup> | Mean_E <sup>c</sup> | Mean_P <sup>d</sup> | MB <sup>e</sup> | MAGE <sup>f</sup> | R <sup>g</sup> |
|-------------------|--------|-----------------------|-----------------------|---------------------|---------------------|-----------------|-------------------|----------------|
| CHN compounds     |        |                       |                       |                     |                     |                 |                   |                |
| Primary amine     | 222    | 4.92                  | 4.82                  | 4.38                | 4.17                | -0.21           | 0.92              | 0.93           |
| Secondary amine   | 322    | 3.94                  | 3.75                  | 3.80                | 3.27                | -0.53           | 0.96              | 0.94           |
| Tertiary amine    | 473    | 3.22                  | 2.23                  | 3.01                | 1.80                | -1.21           | 1.35              | 0.93           |
| Quaternary amine  | 158    | -2.55                 | 2.05                  | -3.38               | 2.04                | 5.42            | 5.42              | 0.86           |
| Heterocyclic ring | 1209   | 1.35                  | 1.53                  | 1.27                | 1.32                | 0.05            | 1.03              | 0.88           |
| Imine             | 249    | 1.00                  | 0.35                  | 0.52                | 0.07                | -0.45           | 1.23              | 0.93           |
| Nitriles          | 282    | 3.53                  | 3.60                  | 3.41                | 3.35                | -0.06           | 0.74              | 0.93           |
| CHON compounds    |        |                       |                       |                     |                     |                 |                   |                |
| Amide             | 5117   | -0.10                 | 0.47                  | -0.49               | -0.11               | 0.41            | 1.67              | 0.84           |
| Imine             | 741    | 0.35                  | -0.09                 | -0.37               | -0.66               | -0.29           | 1.78              | 0.89           |
| Primary amine     | 576    | 2.74                  | 2.78                  | 2.57                | 2.36                | -0.21           | 1.53              | 0.70           |
| Secondary amine   | 748    | 1.10                  | 0.87                  | 0.78                | 0.55                | -0.23           | 1.40              | 0.85           |
| Tertiary amine    | 2130   | 0.63                  | -0.42                 | 0.26                | -0.54               | -0.80           | 1.67              | 0.85           |
| Quaternary amine  | 225    | -4.05                 | -0.23                 | -4.65               | -0.65               | 4.00            | 4.00              | 0.86           |
| Nitroso           | 15     | 3.95                  | 2.78                  | 3.80                | 2.57                | -1.23           | 1.29              | 0.82           |
| Nitro             | 750    | 2.18                  | 0.71                  | 1.92                | 0.35                | -1.56           | 1.76              | 0.88           |
| Organonitrate     | 9      | 3.50                  | 0.30                  | 3.06                | 0.70                | -2.36           | 2.86              | 0.94           |
| Alkyl nitrite     | 3      | 8.39                  | 4.58                  | 8.00                | 4.46                | -3.54           | 3.54              | 0.99           |
| Azole             | 425    | -0.24                 | -0.52                 | -1.27               | -1.24               | 0.04            | 1.79              | 0.84           |
| Pyrimidine        | 1600   | 0.68                  | 0.30                  | 0.26                | -0.08               | -0.34           | 1.40              | 0.84           |
| Purine            | 369    | -1.38                 | -1.65                 | -2.82               | -2.56               | 0.56            | 1.69              | 0.86           |
| Amino acid        | 400    | -1.52                 | 2.05                  | -1.54               | 1.63                | -3.17           | 3.30              | 0.62           |
| nitrile           | 356    | 2.38                  | 1.40                  | 2.23                | 1.01                | -1.21           | 1.64              | 0.81           |
| CHOS compounds    |        |                       |                       |                     |                     |                 |                   |                |
| Organosulfate     | 17     | 1.45                  | 1.90                  | -0.87               | 0.14                | 1.01            | 1.42              | 0.98           |
| Sulfonate         | 295    | -1.25                 | -0.79                 | -2.05               | -1.33               | 0.73            | 2.25              | 0.82           |
| Sulfone           | 173    | 1.33                  | 0.86                  | 1.16                | 0.76                | -0.40           | 0.92              | 0.89           |
| Sulfoxides        | 12     | 1.52                  | 2.30                  | 2.38                | 2.82                | 0.45            | 0.88              | 0.94           |
| Sulfite           | 7      | 5.64                  | 3.14                  | 5.45                | 2.89                | -2.56           | 2.56              | 0.95           |
| CHONS compounds   |        |                       |                       |                     |                     |                 |                   |                |
| Organosulfate     | 8      | -4.01                 | -2.42                 | -4.03               | -2.80               | 1.23            | 1.52              | 0.96           |
| Sulfonate         | 601    | -8.65                 | -7.44                 | -10.94              | -10.41              | 1.79            | 2.22              | 0.97           |
| Sulfone           | 85     | -2.12                 | -4.42                 | -3.70               | -5.95               | -1.66           | 2.09              | 0.94           |
| Sulfonamide       | 648    | -1.03                 | -2.72                 | -1.67               | -3.35               | -1.67           | 1.91              | 0.91           |
| Organic amide     | 178    | -3.27                 | -3.43                 | -4.08               | -4.21               | -0.12           | 1.66              | 0.93           |
| Thioamide         | 244    | -0.21                 | -0.85                 | -0.74               | -1.54               | -0.80           | 1.49              | 0.87           |
| Heterocyclic ring | 1315   | -1.15                 | -0.89                 | -1.98               | -1.68               | 0.33            | 1.55              | 0.90           |
| Amino acid        | 45     | -1.98                 | 1.35                  | -1.54               | 0.92                | 2.47            | 2.57              | 0.91           |
| Thioate           | 58     | 0.30                  | -0.28                 | -0.28               | -1.56               | -1.28           | 1.94              | 0.86           |
| thiocarbamate     | 36     | -2.67                 | -1.55                 | -3.64               | -2.44               | 1.20            | 1.62              | 0.92           |

<sup>a</sup>Median  $\log_{10}(C_o)$  predicted by the EPI Suite.

<sup>b</sup>Median  $\log_{10}(C_o)$  predicted by the Eq. (2).

<sup>c</sup>Mean  $\log_{10}(C_o)$  predicted by the EPI Suite.

<sup>d</sup>Mean  $\log_{10}(C_o)$  predicted by the Eq. (2).

<sup>e</sup>Mean bias.

<sup>f</sup>Mean absolute gross error.

<sup>g</sup>Correlation coefficient.

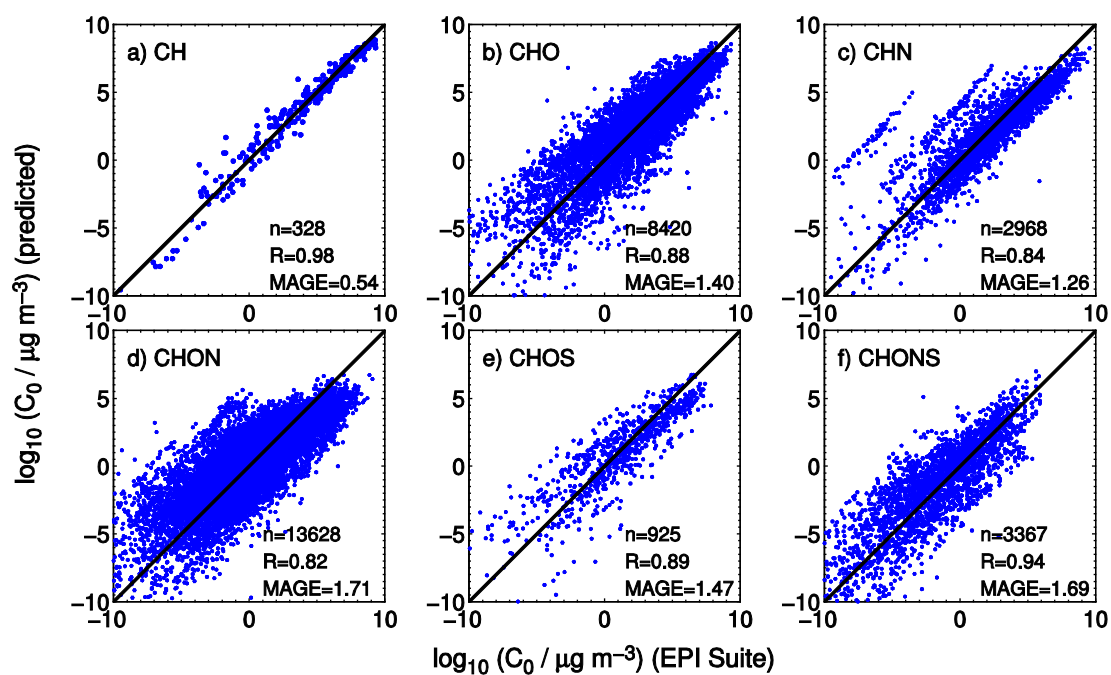

**Figure S1.** Saturation mass concentration ( $C_0$ ) of organic compounds predicted by Eq. S1 using the parameters in Table S1 plotted against  $C_0$  determined by the EPI Suite software in the NCI database for elemental composition classes of **(a)** CH, **(b)** CHO, **(c)** CHN, **(d)** CHON, **(e)** CHOS, and **(f)** CHONS.

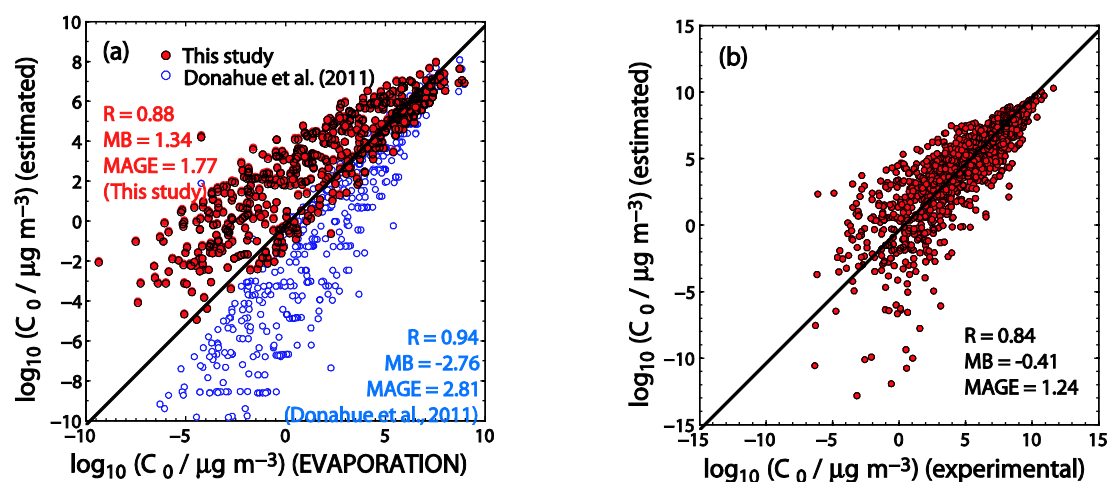

**Figure S2.** (a) Saturation mass concentration ( $C_0$ ) of CHO compounds predicted by Eq. S1 with the coefficients in Table S1 and with the coefficients from Donahue et al. (2011) plotted against  $C_0$  computed by the EVAPORATION model (Compernelle et al., 2011). The data comprise 704 SOA oxidation products from biogenic (isoprene,  $\alpha$ -pinene, limonene, glyoxal) and anthropogenic precursors (C12 alkanes) as presented in Shiraiwa et al. (2014). (b) Comparison of  $C_0$  predicted by Eq. S1 with the coefficients in Table S1 and experimental values taken from PHYSPROP database (<http://esc.syrres.com/interkow/EpiSuiteData.htm>).
